# Supplementary material for: A Microglial Signature Directing Human Aging and Neurodegeneration-Related Gene Networks
Source: Front Neurosci. 2019 Jan 24;13:2. doi: 10.3389/fnins.2019.00002 (PMC6353788; doi:10.3389/fnins.2019.00002)
Supplement: Supplementary file 2 [file Table_2.XLSX]

## Sheet: TableS2A
TableS2A: Comparison of Mouse Aging WGCNA modules with cell type signature genes (hypergeometric test)
Note: For significant overlaps the rows are filled with color corrosponding to module color
GithubFrontiersNeurosciDec2018\MsAge\enrichmentsCellType_OvGenes\enrichments_NumOvGenes_pvalue_colors.csv
GithubFrontiersNeurosciDec2018\MsAge\enrichmentsCellType_OvGenes\enrichments_NumOvGenes_pvalue_labels.csv
GithubFrontiersNeurosciDec2018\MsAge\Intermediate\CellType_GSE52564_FCover20_Signature_Hu_GeneCount.csv
GithubFrontiersNeurosciDec2018\MsAge\Module_Trait&CellType&GO\geneListsModuleSummarylabels_GeneCount.csv
MouseModule(InputCategories)	MouseModule(InputCategories, colors)	NoOfGenesModule	CellTypeSpecificGenes(UserDefinedCategories)	NoOfGenesCellType	NumOverlap	Pvalues	CorrectedPvalues
MsAge7K_04	yellow	147	MicrogliByothersCuffdiff2FCover20	1147	73	1.80639e-39	2.27605e-37
MsAge7K_09	magenta	84	MyeOligoByothersCuffdiff2FCover20	263	23	2.55476e-22	3.219e-20
MsAge7K_06	red	101	NeuronByothersCuffdiff2FCover20	706	30	2.17978e-17	2.74653e-15
MsAge7K_02	blue	237	NeuronByothersCuffdiff2FCover20	706	39	7.15808e-13	9.01918e-11
MsAge7K_08	pink	84	NeuronByothersCuffdiff2FCover20	706	20	4.65334e-10	5.8632e-08
MsAge7K_01	turquoise	259	MyeOligoByothersCuffdiff2FCover20	263	21	1.77962e-09	2.24232e-07
MsAge7K_05	green	111	NeuronByothersCuffdiff2FCover20	706	21	1.46208e-08	1.84222e-06
MsAge7K_07	black	101	EndotheByothersCuffdiff2FCover20	626	22	3.78819e-08	4.77311e-06
MsAge7K_07	black	101	PreOligoByothersCuffdiff2FCover20	116	7	3.46704e-05	0.00436847
MsAge7K_01	turquoise	259	NewOligoByothersCuffdiff2FCover20	82	6	0.000655626	0.0826089
MsAge7K_00	grey	5665	AstroByothersCuffdiff2FCover20	451	195	0.774507	1
MsAge7K_00	grey	5665	EndotheByothersCuffdiff2FCover20	626	339	0.0416281	1
MsAge7K_00	grey	5665	MicrogliByothersCuffdiff2FCover20	1147	493	0.44972	1
MsAge7K_00	grey	5665	MyeOligoByothersCuffdiff2FCover20	263	71	1	1
MsAge7K_00	grey	5665	NeuronByothersCuffdiff2FCover20	706	181	1	1
MsAge7K_00	grey	5665	NewOligoByothersCuffdiff2FCover20	82	20	0.970201	1
MsAge7K_00	grey	5665	PreOligoByothersCuffdiff2FCover20	116	40	0.999713	1
MsAge7K_01	turquoise	259	AstroByothersCuffdiff2FCover20	451	8	0.698308	1
MsAge7K_01	turquoise	259	EndotheByothersCuffdiff2FCover20	626	12	0.816158	1
MsAge7K_01	turquoise	259	MicrogliByothersCuffdiff2FCover20	1147	11	0.998318	1
MsAge7K_01	turquoise	259	NeuronByothersCuffdiff2FCover20	706	10	0.731172	1
MsAge7K_01	turquoise	259	PreOligoByothersCuffdiff2FCover20	116	5	0.0884054	1
MsAge7K_02	blue	237	AstroByothersCuffdiff2FCover20	451	13	0.0746494	1
MsAge7K_02	blue	237	EndotheByothersCuffdiff2FCover20	626	5	0.998221	1
MsAge7K_02	blue	237	MicrogliByothersCuffdiff2FCover20	1147	12	0.988102	1
MsAge7K_02	blue	237	MyeOligoByothersCuffdiff2FCover20	263	0	1	1
MsAge7K_02	blue	237	NewOligoByothersCuffdiff2FCover20	82	0	1	1
MsAge7K_02	blue	237	PreOligoByothersCuffdiff2FCover20	116	4	0.172265	1
MsAge7K_03	brown	149	AstroByothersCuffdiff2FCover20	451	10	0.0370773	1
MsAge7K_03	brown	149	EndotheByothersCuffdiff2FCover20	626	5	0.93459	1
MsAge7K_03	brown	149	MicrogliByothersCuffdiff2FCover20	1147	5	0.997256	1
MsAge7K_03	brown	149	MyeOligoByothersCuffdiff2FCover20	263	3	0.466534	1
MsAge7K_03	brown	149	NeuronByothersCuffdiff2FCover20	706	8	0.351026	1
MsAge7K_03	brown	149	NewOligoByothersCuffdiff2FCover20	82	0	1	1
MsAge7K_03	brown	149	PreOligoByothersCuffdiff2FCover20	116	2	0.398722	1
MsAge7K_04	yellow	147	AstroByothersCuffdiff2FCover20	451	7	0.260133	1
MsAge7K_04	yellow	147	EndotheByothersCuffdiff2FCover20	626	11	0.220425	1
MsAge7K_04	yellow	147	MyeOligoByothersCuffdiff2FCover20	263	2	0.717754	1
MsAge7K_04	yellow	147	NeuronByothersCuffdiff2FCover20	706	1	0.998893	1
MsAge7K_04	yellow	147	NewOligoByothersCuffdiff2FCover20	82	0	1	1
MsAge7K_04	yellow	147	PreOligoByothersCuffdiff2FCover20	116	0	1	1
MsAge7K_05	green	111	AstroByothersCuffdiff2FCover20	451	2	0.907128	1
MsAge7K_05	green	111	EndotheByothersCuffdiff2FCover20	626	4	0.886871	1
MsAge7K_05	green	111	MicrogliByothersCuffdiff2FCover20	1147	2	0.999541	1
MsAge7K_05	green	111	MyeOligoByothersCuffdiff2FCover20	263	0	1	1
MsAge7K_05	green	111	NewOligoByothersCuffdiff2FCover20	82	0	1	1
MsAge7K_05	green	111	PreOligoByothersCuffdiff2FCover20	116	4	0.0186289	1
MsAge7K_06	red	101	AstroByothersCuffdiff2FCover20	451	5	0.282827	1
MsAge7K_06	red	101	EndotheByothersCuffdiff2FCover20	626	5	0.694091	1
MsAge7K_06	red	101	MicrogliByothersCuffdiff2FCover20	1147	4	0.979726	1
MsAge7K_06	red	101	MyeOligoByothersCuffdiff2FCover20	263	0	1	1
MsAge7K_06	red	101	NewOligoByothersCuffdiff2FCover20	82	0	1	1
MsAge7K_06	red	101	PreOligoByothersCuffdiff2FCover20	116	2	0.237014	1
MsAge7K_07	black	101	AstroByothersCuffdiff2FCover20	451	4	0.478161	1
MsAge7K_07	black	101	MicrogliByothersCuffdiff2FCover20	1147	8	0.658231	1
MsAge7K_07	black	101	MyeOligoByothersCuffdiff2FCover20	263	2	0.514923	1
MsAge7K_07	black	101	NeuronByothersCuffdiff2FCover20	706	2	0.945095	1
MsAge7K_07	black	101	NewOligoByothersCuffdiff2FCover20	82	0	1	1
MsAge7K_08	pink	84	AstroByothersCuffdiff2FCover20	451	2	0.801389	1
MsAge7K_08	pink	84	EndotheByothersCuffdiff2FCover20	626	1	0.993137	1
MsAge7K_08	pink	84	MicrogliByothersCuffdiff2FCover20	1147	2	0.995739	1
MsAge7K_08	pink	84	MyeOligoByothersCuffdiff2FCover20	263	0	1	1
MsAge7K_08	pink	84	NewOligoByothersCuffdiff2FCover20	82	0	1	1
MsAge7K_08	pink	84	PreOligoByothersCuffdiff2FCover20	116	0	1	1
MsAge7K_09	magenta	84	AstroByothersCuffdiff2FCover20	451	3	0.572209	1
MsAge7K_09	magenta	84	EndotheByothersCuffdiff2FCover20	626	2	0.957699	1
MsAge7K_09	magenta	84	MicrogliByothersCuffdiff2FCover20	1147	3	0.98064	1
MsAge7K_09	magenta	84	NeuronByothersCuffdiff2FCover20	706	1	0.979176	1
MsAge7K_09	magenta	84	NewOligoByothersCuffdiff2FCover20	82	2	0.0490414	1
MsAge7K_09	magenta	84	PreOligoByothersCuffdiff2FCover20	116	2	0.179891	1
MsAge7K_10	purple	77	AstroByothersCuffdiff2FCover20	451	1	0.93759	1
MsAge7K_10	purple	77	EndotheByothersCuffdiff2FCover20	626	0	1	1
MsAge7K_10	purple	77	MicrogliByothersCuffdiff2FCover20	1147	3	0.968473	1
MsAge7K_10	purple	77	MyeOligoByothersCuffdiff2FCover20	263	0	1	1
MsAge7K_10	purple	77	NeuronByothersCuffdiff2FCover20	706	0	1	1
MsAge7K_10	purple	77	NewOligoByothersCuffdiff2FCover20	82	0	1	1
MsAge7K_10	purple	77	PreOligoByothersCuffdiff2FCover20	116	0	1	1
MsAge7K_11	greenyellow	64	AstroByothersCuffdiff2FCover20	451	1	0.9001	1
MsAge7K_11	greenyellow	64	EndotheByothersCuffdiff2FCover20	626	5	0.303532	1
MsAge7K_11	greenyellow	64	MicrogliByothersCuffdiff2FCover20	1147	5	0.661905	1
MsAge7K_11	greenyellow	64	MyeOligoByothersCuffdiff2FCover20	263	0	1	1
MsAge7K_11	greenyellow	64	NeuronByothersCuffdiff2FCover20	706	6	0.0657116	1
MsAge7K_11	greenyellow	64	NewOligoByothersCuffdiff2FCover20	82	1	0.239293	1
MsAge7K_11	greenyellow	64	PreOligoByothersCuffdiff2FCover20	116	0	1	1
MsAge7K_12	tan	51	AstroByothersCuffdiff2FCover20	451	0	1	1
MsAge7K_12	tan	51	EndotheByothersCuffdiff2FCover20	626	0	1	1
MsAge7K_12	tan	51	MicrogliByothersCuffdiff2FCover20	1147	2	0.94334	1
MsAge7K_12	tan	51	MyeOligoByothersCuffdiff2FCover20	263	0	1	1
MsAge7K_12	tan	51	NeuronByothersCuffdiff2FCover20	706	0	1	1
MsAge7K_12	tan	51	NewOligoByothersCuffdiff2FCover20	82	1	0.195677	1
MsAge7K_12	tan	51	PreOligoByothersCuffdiff2FCover20	116	0	1	1
MsAge7K_13	salmon	41	AstroByothersCuffdiff2FCover20	451	0	1	1
MsAge7K_13	salmon	41	EndotheByothersCuffdiff2FCover20	626	1	0.91144	1
MsAge7K_13	salmon	41	MicrogliByothersCuffdiff2FCover20	1147	2	0.881947	1
MsAge7K_13	salmon	41	MyeOligoByothersCuffdiff2FCover20	263	0	1	1
MsAge7K_13	salmon	41	NeuronByothersCuffdiff2FCover20	706	1	0.84802	1
MsAge7K_13	salmon	41	NewOligoByothersCuffdiff2FCover20	82	0	1	1
MsAge7K_13	salmon	41	PreOligoByothersCuffdiff2FCover20	116	1	0.315476	1
MsAge7K_14	cyan	39	AstroByothersCuffdiff2FCover20	451	4	0.0470459	1
MsAge7K_14	cyan	39	EndotheByothersCuffdiff2FCover20	626	3	0.388	1
MsAge7K_14	cyan	39	MicrogliByothersCuffdiff2FCover20	1147	1	0.971178	1
MsAge7K_14	cyan	39	MyeOligoByothersCuffdiff2FCover20	263	0	1	1
MsAge7K_14	cyan	39	NeuronByothersCuffdiff2FCover20	706	0	1	1
MsAge7K_14	cyan	39	NewOligoByothersCuffdiff2FCover20	82	1	0.153276	1
MsAge7K_14	cyan	39	PreOligoByothersCuffdiff2FCover20	116	0	1	1
MsAge7K_15	midnightblue	35	AstroByothersCuffdiff2FCover20	451	0	1	1
MsAge7K_15	midnightblue	35	EndotheByothersCuffdiff2FCover20	626	0	1	1
MsAge7K_15	midnightblue	35	MicrogliByothersCuffdiff2FCover20	1147	5	0.182404	1
MsAge7K_15	midnightblue	35	MyeOligoByothersCuffdiff2FCover20	263	1	0.451714	1
MsAge7K_15	midnightblue	35	NeuronByothersCuffdiff2FCover20	706	5	0.0187894	1
MsAge7K_15	midnightblue	35	NewOligoByothersCuffdiff2FCover20	82	0	1	1
MsAge7K_15	midnightblue	35	PreOligoByothersCuffdiff2FCover20	116	0	1	1
MsAge7K_16	lightcyan	32	AstroByothersCuffdiff2FCover20	451	0	1	1
MsAge7K_16	lightcyan	32	EndotheByothersCuffdiff2FCover20	626	2	0.554352	1
MsAge7K_16	lightcyan	32	MicrogliByothersCuffdiff2FCover20	1147	2	0.778954	1
MsAge7K_16	lightcyan	32	MyeOligoByothersCuffdiff2FCover20	263	0	1	1
MsAge7K_16	lightcyan	32	NeuronByothersCuffdiff2FCover20	706	0	1	1
MsAge7K_16	lightcyan	32	NewOligoByothersCuffdiff2FCover20	82	0	1	1
MsAge7K_16	lightcyan	32	PreOligoByothersCuffdiff2FCover20	116	0	1	1
MsAge7K_17	grey60	24	AstroByothersCuffdiff2FCover20	451	2	0.206219	1
MsAge7K_17	grey60	24	EndotheByothersCuffdiff2FCover20	626	1	0.757623	1
MsAge7K_17	grey60	24	MicrogliByothersCuffdiff2FCover20	1147	0	1	1
MsAge7K_17	grey60	24	MyeOligoByothersCuffdiff2FCover20	263	1	0.337524	1
MsAge7K_17	grey60	24	NeuronByothersCuffdiff2FCover20	706	2	0.292374	1
MsAge7K_17	grey60	24	NewOligoByothersCuffdiff2FCover20	82	0	1	1
MsAge7K_17	grey60	24	PreOligoByothersCuffdiff2FCover20	116	0	1	1

## Sheet: TableS2B
TableS2B: Comparison of Mouse Aging WGCNA modules with cell type signature genes (overlapping genes between mouse yellow and cell type specific genes)
GithubFrontiersNeurosciDec2018\MsAge\Module_GeneskMEHubs\MsAge7K_04.txt
GithubFrontiersNeurosciDec2018\MsAge\enrichmentsCellType_OvGenes\MsAge7K_04 -- MicrogliByothersCuffdiff2FCover20__.txt
GithubFrontiersNeurosciDec2018\MsAge\Intermediate\CellType_GSE52564_FCover20_Signature_Hu.csv
MsAge7K_04 or Yellow_Module_Genes	Microglia_CellType_Genes	Overlap_MsAge7K_04 or YellowModule_Mciroglia_Genes
C4B	C4orf19	APBB1IP
C4A	C20orf144	ARHGAP45
KLK6	C15orf39	C1QA
C3	C8orf37	C1QB
IFIT1B	C10orf99	C1QC
IFIT3	C7orf50	C3
IFI27L2	C19orf71	C3AR1
CLEC7A	CXorf21	CAPG
SULT1C3	C17orf99	CCL8
IRF7	AASDH	CD22
CYBB	AATF	CD300C
BST2	C19orf38	CD37
ITGAX	ABCA9	CD48
LGALS3BP	ABCC3	CD52
UPK1B	ABHD12	CD84
RSAD2	ABHD14A	CD86
SULT1C2	ABHD15	CLEC7A
CYP2E1	ABI3	CMKLR1
CD52	ABL1	CSF1
ASPG	ABL2	CSF3R
IGHM	ACCS	CST7
COX8C	ACP5	CTSS
FLNC	ADAM15	CTSZ
MX1	ADAM33	CX3CR1
ISG15	ADAM8	CXCL16
RTP4	ADAMTS16	CYBB
APOD	ADAP2	DOCK2
DDX60	ADCY3	FCER1G
C3AR1	ADCY7	FCGR2A
BDKRB2	ADGRE1	FCGR2B
LAG3	ADGRG1	FCGR2C
IFITM2	ADGRG5	FERMT3
IFITM3	ADORA3	HLA-DOB
IFITM1	ADRB2	HPGDS
SLC11A1	AGMO	IFI27L2
CST7	AGPAT1	IGHM
PTPRC	AIM2	IKZF1
TRIM14	AKAP13	IP6K3
ZC3HAV1	AKT1	ITGAM
PROM2	ALAS1	ITGAX
SAMD9L	ALOX15	ITGB2
CD48	ALOX5	LAG3
XAF1	ALOX5AP	LAIR1
CMKLR1	AMDHD2	LAPTM5
TAP1	AMN1	LSP1
OAS2	AMPH	LY86
LSP1	AMZ1	MAN2B1
PARP14	ANG	MLPH
USP18	ANGPTL7	MMP12
USP41	ANKHD1	MPEG1
ERICH5	ANKHD1-EIF4EBP3	MS4A7
CXCL16	AOAH	MYO1F
HLA-DOB	AP1G2	NFAM1
SLC15A3	AP5S1	OAS2
SVEP1	AP5Z1	PIK3CG
OSMR	APBB1IP	PLCG2
IRGM	APC2	PLD4
MLPH	APOBEC1	PLEK
GPNMB	APOBEC2	PTPN6
CAPG	APOBEC3H	PTPRC
DDX58	APOBR	RNASE4
ST14	APOC2	SELPLG
OAS1	ARL17A	SKAP2
SLAMF9	ARL17B	SLAMF9
CD37	ARHGAP15	SLC11A1
IFIH1	ARHGAP17	SLC15A3
CD84	ARHGAP22	ST14
IFI16	ARHGAP25	TMEM119
PYHIN1	ARHGAP27	TREM2
CD300C	ARHGAP30	TRIM14
NAALAD2	ARHGAP4	TYROBP
PTPN6	ARHGAP45	UBA7
UBA7	ARHGAP9	UNC93B1
CD86	ARHGDIB
TREM2	ARHGEF10L
ITGB2	ARHGEF40
FCER1G	ARHGEF6
TFCP2L1	ARID3A
TAP2	ARID5A
IP6K3	ARL11
TYROBP	ARL4C
CD22	ARL5C
CTSS	ARMC3
MS4A7	ARNT2
VIM	ARRDC2
PIK3CG	ASB10
DBP	ASB2
IRF9	ASGR2
C1QA	ASPH
FERMT3	ATAT1
CSF3R	ATF3
MPEG1	ATP2A3
MMP12	ATP2C1
FCGR2A	ATP6AP1
FCGR2B	ATP6V0C
FCGR2C	ATP6V1A
LY86	ATP6V1F
IFIT2	AVPR2
PLD4	B3GALNT2
DOCK2	B4GALNT1
ARHGAP45	B4GALT1
MYO1F	BANK1
CCL8	BASP1
STAT1	BATF
TRIM25	BATF3
NFAM1	BBS9
IKZF1	C7orf43
MVP	SMIM35
EYA4	BCL2A1
C1QC	BCL2L1
S100A6	BCL3
PARP3	BCL7C
PLCG2	BCOR
C1QB	BID
LAIR1	BIN2
APBB1IP	BLNK
ANXA3	BLVRA
PARP12	BLVRB
BHLHE41	BMF
PLEK	BRD2
LAPTM5	BST1
PROS1	BTBD10
EIF2AK2	BTK
TMEM119	SP110
SFI1	C1QA
UNC93B1	C1QB
SHKBP1	C1QC
RNASE4	C1RL
HPGDS	C2CD3
SELPLG	C3
SLC14A1	C3AR1
ITGAM	C5AR1
SKAP2	C5AR2
CSF1	CABIN1
CTSZ	CABLES1
MSN	CACNA1S
B3GALT5	CALB1
MTHFD1L	CALHM2
STAT2	CAMK1
VWA5A	CAMP
ANXA5	CANT1
PLEKHH2	CAPG
CX3CR1	CAPN1
APOE	CAPN3
LBH	CAPNS1
NPC2	CA9
MAN2B1	CARD11
	CARD9
	CARS
	CASS4
	CBL
	CCDC88B
	CCL8
	CCL2
	CCL22
	CCL24
	CCL3
	CCL3L3
	CCL3L1
	CCL18
	CCL4
	CCL4L2
	CCL5
	CCL15-CCL14
	CCL23
	CCL15
	CCL7
	CCL26
	CCM2
	CCND3
	CCR1
	CCR2
	CCR5
	CCR6
	CCR7
	CCRL2
	CD101
	CD14
	CD163
	CD180
	CD19
	CD2
	CD200R1
	CD200R1L
	CD209
	CD22
	CD247
	CD2BP2
	CD300C
	CD300LB
	CD300LF
	CD36
	CD37
	CD3D
	CD4
	CD48
	CD5
	CD52
	CD53
	CD6
	CD7
	CD72
	CD74
	CD79A
	CD79B
	CD80
	CD83
	CD84
	CD86
	CDH23
	CDK6
	CDKN1A
	CDS1
	PSG1
	PSG11
	CEACAM8
	PSG9
	PSG3
	CEACAM1
	PSG4
	PSG5
	PSG7
	PSG6
	PSG8
	PSG2
	CEBPA
	CEBPB
	CELA1
	CEP250
	CEP89
	CFAP74
	CFLAR
	CH25H
	CHEK2
	CHST12
	CIART
	CKM
	CLCF1
	CLEC12A
	CLEC2D
	CLEC4A
	CLEC4C
	CLEC4D
	CLEC4E
	CLEC6A
	CLEC5A
	CLEC7A
	CLN3
	CMKLR1
	CMTM3
	CMTM7
	CNDP2
	CNR2
	COL15A1
	COL27A1
	COL6A3
	COLGALT1
	COMP
	CORO1A
	COTL1
	CPN1
	CRAT
	CRIP1
	CRYBA4
	CRYBB1
	CRYZ
	CSF1
	CSF1R
	CSF2
	CSF2RB
	CSF3R
	CSK
	CSNK1D
	CSNK1E
	TPTEP2-CSNK1E
	CST7
	CTBP1
	CTC1
	CTSA
	CTSB
	CTSD
	CTSE
	CTSS
	CTSZ
	CX3CR1
	CXCL16
	CXCR3
	CXCR5
	CYBB
	CYFIP1
	CYP4F3
	CYSLTR1
	CYTH4
	CYTIP
	DAGLB
	DAPP1
	DCAKD
	DCLRE1B
	DENND1C
	DENND4A
	DENND4B
	DGKD
	DGKZ
	DGLUCY
	DHRS3
	DHX34
	DISC1
	DMRTB1
	DNAH2
	DNAJB13
	DNASE1L3
	DNASE2
	DNMT3A
	DNMT3B
	DNPEP
	DNTTIP2
	DOCK2
	DOCK8
	DOK1
	DOK2
	DOK3
	DOT1L
	DPAGT1
	DTX4
	DUOXA1
	DUPD1
	DUSP13
	DUSP2
	DUSP27
	DYRK4
	RNASE2
	RNASE3
	EBI3
	EBNA1BP2
	EEF2K
	EFHD2
	EGR2
	EGR3
	EHD4
	ELAC2
	ELF4
	ELMO1
	EMG1
	EMP3
	ENO2
	ENTPD1
	ENTPD5
	ENTPD7
	EPS8
	EPSTI1
	ERMAP
	ESPL1
	ETFA
	EVA1A
	EVI2A
	EVL
	EXTL2
	F11R
	F13A1
	F9
	FAM110A
	FAM167B
	FAM19A1
	FAM81A
	FAM83G
	FBLIM1
	FBXO3
	FBXW4
	FCER1G
	FCGR1B
	FCGR1A
	FCGR2B
	FCGR2A
	FCGR2C
	FCGR3A
	FCGR3B
	FCHO2
	FCMR
	FCRL1
	FERMT3
	FES
	FGD2
	FGD3
	FGGY
	FGR
	FHAD1
	FHOD1
	FKBP4
	FLNA
	FMNL1
	FMNL3
	FNDC3A
	FNDC7
	FOCAD
	FOLR2
	FOXN3
	FPR1
	FRMD4A
	FUNDC2
	FURIN
	FYB1
	FYCO1
	GABPB1
	GABRD
	GAL3ST1
	GAL3ST4
	GALNT11
	GALNT12
	GATAD2A
	GBGT1
	GCN1
	GCNT1
	GDAP2
	GDF15
	GEMIN7
	GFM2
	GGT5
	GLG1
	GLIPR1
	C1orf56
	C11orf96
	DNAJC25-GNG10
	GPC2
	C1orf127
	GMFG
	GMIP
	GNA15
	GNB1
	GNE
	GNGT2
	GNS
	GOLM1
	GP9
	GPAT2
	GPR157
	GPR18
	GPR183
	GPR34
	GPR35
	GPR65
	GPRC5C
	GPSM3
	GRAMD1A
	GRAMD1B
	GRHPR
	GRIPAP1
	GRN
	GSDMD
	GSG1
	GTDC1
	GTF2IRD2B
	GTF2IRD2
	GTPBP1
	GUCA1A
	GUSB
	HLA-DMB
	HLA-DOA
	HLA-DOB
	HAAO
	HAUS3
	HAVCR2
	HCAR3
	HCAR2
	HCK
	HCLS1
	HCST
	HECTD1
	HELB
	HELZ
	HEXA
	HEXB
	HFE
	HIF3A
	HK2
	HK3
	HMGA1
	HMGN3
	HMOX1
	HNRNPF
	HP
	HPR
	HPGDS
	HPN
	HPS4
	HPSE
	HRC
	HRH2
	HSF2BP
	HSPA1A
	HSPA1B
	HSPB3
	HTRA2
	HVCN1
	ICAM1
	ICOS
	ICOSLG
	IER3
	IER5
	IFI27L2
	IFITM10
	IFT140
	IFT43
	IGHM
	IGKC
	IGLC2
	IGLC3
	IGLC7
	IGLL5
	IGLL1
	IGLC1
	IGSF6
	IKZF1
	IL10
	IL10RA
	IL12B
	IL15
	IL16
	IL17RA
	IL1A
	IL1B
	IL1R2
	IL1RL1
	IL1RL2
	IL1RN
	IL21R
	IL2RB
	IL4I1
	IL4R
	IL6R
	IL7R
	ILDR1
	INO80E
	INPP5D
	IP6K3
	IQSEC2
	IRAK2
	IREB2
	IRF4
	IRF5
	ISCU
	ISYNA1
	ITGAE
	ITGAL
	ITGAM
	ITGAV
	ITGAX
	ITGB2
	ITGB5
	ITPRIPL1
	JADE2
	JAK3
	KAT14
	KCNA7
	KCNAB2
	KCNK12
	KCNK6
	KCNN4
	KCTD12
	KCTD9
	KDM4C
	KHK
	KLHDC8B
	KLHL38
	KLRD1
	KPTN
	LAG3
	LAIR1
	LAPTM5
	LASP1
	LAT
	LAT2
	LBX1
	LBX2
	LCK
	LCP1
	LCP2
	LEKR1
	LFNG
	LGALS1
	LGALS3
	LGMN
	LIF
	LIMD2
	LIMK1
	LIPH
	LPAR5
	LPCAT2
	LPXN
	LRBA
	LRCH4
	LRMP
	LRP5L
	LRP5
	LRRC25
	LRRC28
	LRRC75A
	LSP1
	LST1
	LTB
	LTC4S
	LTF
	LY6D
	LY6E
	LY86
	LY9
	LYL1
	LYN
	LYVE1
	M1AP
	MADD
	MAF
	MAFB
	MAFF
	MAN2B1
	MAN2B2
	MAP3K8
	MARCH1
	MARK2
	MATN4
	CGAS
	MBNL1
	MBOAT7
	MBTPS1
	MCEMP1
	MCL1
	MED12L
	MED27
	MFSD12
	MFSD13A
	CLEC10A
	MGME1
	MICAL1
	MICAL3
	MIER1
	MILR1
	MIPOL1
	MKNK1
	MLPH
	MLXIPL
	MMP12
	MMP9
	MOB3C
	MON2
	MPEG1
	MRC1
	MS4A4A
	MS4A4E
	MS4A7
	MSH5
	MSH5-SAPCD1
	MSR1
	MTR
	MYADML2
	MYBPC3
	MYLIP
	MYMK
	MYO18B
	MYO1C
	MYO1F
	MYO1G
	MYO7A
	MYO9B
	MYOM1
	NAA20
	NAB2
	NAPSA
	NBAS
	NBEAL2
	NCF1
	NCF2
	NCF4
	NCKAP1L
	NCKIPSD
	NCOA4
	NDUFC2-KCTD14
	NDUFC2
	NECAB3
	NELFCD
	NEURL1
	NEURL3
	NFAM1
	NFATC2
	NFKB2
	NFKBID
	NFKBIE
	NFKBIZ
	NFYA
	NINJ1
	NIPAL3
	NKG7
	NLRP1
	NLRP3
	NME6
	NOCT
	NOD2
	NPDC1
	NPL
	NPNT
	NR4A3
	NRAP
	NRGN
	NRROS
	NTM
	NTPCR
	NUAK2
	NUDT1
	NUDT16
	NUDT9
	NUMB
	NUPR1
	NXF1
	OAS2
	OASL
	OCSTAMP
	OLFM4
	OLFML3
	OR5V1
	OPHN1
	ORAI2
	OSBPL9
	OSGIN1
	OSM
	P2RX1
	P2RX7
	P2RY12
	P2RY13
	P2RY2
	P2RY6
	P3H1
	P3H2
	PACSIN2
	PAG1
	PAN2
	PAOX
	PARP10
	PARVG
	PBX3
	PBXIP1
	PCBD1
	PCDHGB2
	PCNX2
	PCTP
	PDCD1
	PDE7B
	PDGFB
	PDZK1IP1
	PEPD
	PER1
	PFKFB4
	PHF10
	PHF11
	PHOSPHO2
	PIGN
	PIK3AP1
	PIK3CD
	PIK3CG
	PIK3R5
	PIP5K1A
	PIP5K1C
	LILRA4
	PITPNM3
	PKD1
	PKIG
	PLA2G15
	PLA2G2D
	PLA2G4A
	PLA2G4D
	PLAC8
	PLAU
	PLAUR
	PLBD1
	PLCB2
	PLCD1
	PLCG2
	PLD3
	PLD4
	PLEK
	PLEKHG5
	PLEKHM2
	PLEKHM3
	PLEKHO1
	PLEKHO2
	PLGRKT
	PLK3
	PLOD1
	PLRG1
	PLXDC2
	PLXNB2
	PML
	PMP22
	PNPLA7
	POU2F1
	POU2F2
	PPCDC
	PPFIA3
	PPP1R15A
	PPP1R18
	PPP1R3B
	PPP5C
	PRG2
	PRKCD
	PRKCH
	PRPF3
	PSAP
	PSD4
	PSMB8
	PSMB9
	PSMD8
	PTAFR
	PTBP3
	PTGER4
	PTGES
	PTGR2
	PTGS1
	PTK2B
	PTPN18
	PTPN2
	PTPN6
	PTPRC
	PTPRO
	PYCARD
	QPRT
	R3HDM4
	RAB17
	RAB20
	RAB25
	RAB27A
	RAB3IL1
	RAC2
	RAMP3
	RAPSN
	RASA4
	RASA4B
	RASAL3
	RBM19
	RBM38
	RBM47
	RCAN1
	RCBTB2
	RCSD1
	RENBP
	RETNLB
	RGS1
	RGS10
	RGS14
	RGS19
	RHBDD3
	RHBDF2
	RHOBTB1
	RHOH
	RILPL2
	RIN3
	RIPK3
	RNASE10
	RNASE12
	RNASE4
	RNASE6
	RNF145
	RNF19B
	RNF216
	ROBO3
	ROGDI
	RPL13A
	RPL35
	RPRD1B
	RPS10
	RPS21
	RPS6KA1
	RPS6KB2
	RPS9
	RPTOR
	RRAD
	RTN1
	RTN4
	RTN4RL1
	RUBCNL
	RUNDC3A
	RUNX1
	RUNX3
	S100A8
	S100A9
	S1PR4
	SAMD4A
	SAP25
	SAPCD1
	SASH3
	SAT1
	SBNO2
	SCFD2
	SCIMP
	SCMH1
	SCUBE1
	SDHA
	SEC11A
	SELPLG
	SEMA3F
	SEMA4D
	SERPINB8
	SERPINE1
	SERPINF1
	SETD4
	SFXN4
	SGK1
	SH2B2
	SH2B3
	SH2D6
	SH3BP1
	SH3TC1
	SHISA5
	SHMT1
	SIGLEC1
	SIGLEC12
	SIGLEC8
	SIGLEC7
	SIGLEC9
	SIGLEC11
	SIGLEC10
	CD33
	SKAP2
	SLA
	SLAMF1
	SLAMF6
	SLAMF8
	SLAMF9
	SLC11A1
	SLC15A3
	SLC15A4
	SLC16A10
	SLC16A3
	SLC17A9
	SLC22A17
	SLC22A18
	SLC25A10
	SLC25A37
	SLC25A45
	SLC25A5
	SLC29A1
	SLC2A5
	SLC2A9
	SLC30A6
	SLC35A1
	SLC35C2
	SLC35F6
	SLC36A2
	SLC37A2
	SLC37A4
	SLC38A11
	SLC38A7
	SLC43A1
	SLC43A2
	SLC45A3
	SLC5A10
	SLC7A7
	SLC8B1
	SLC9A8
	SLCO2B1
	SLCO4A1
	SLFN12
	SLFN12L
	SLFN11
	SLFN13
	SMAGP
	SNORA62
	SNX10
	SNX14
	SNX20
	SNX8
	SOCS3
	SOX15
	SPACA9
	SPATA5
	SPECC1
	SPHK1
	SPHK2
	SPI1
	SPIB
	SPN
	SPNS3
	SPP1
	SQOR
	SRGAP2C
	SRGAP2
	SRGAP2B
	SSH2
	ST14
	ST6GALNAC4
	STAB1
	STARD5
	STAT5B
	STAT6
	STAU2
	STK11
	STK11IP
	STON2
	STX11
	SUCO
	SUSD1
	SUSD3
	SYK
	SYNGR2
	SYNJ2BP
	TAB3
	TACC1
	TAF1C
	TAF6L
	TAGAP
	TAL1
	TANK
	TAOK2
	TBC1D17
	TBCA
	TBCD
	TBXAS1
	TCIRG1
	TCN2
	TDRD3
	TEC
	TEP1
	TERF2
	TEX10
	TFCP2
	TFE3
	TFEC
	TGFB1
	TGFBI
	TGIF1
	TGM1
	TGM2
	THEMIS2
	THOC6
	TICAM1
	TIFAB
	TIMD4
	TLE3
	TLN2
	TLR1
	TLR2
	TLR5
	TLR6
	TLR7
	TLR9
	TM6SF1
	TMBIM4
	TMC6
	TMC8
	TMCC3
	TMED7-TICAM2
	TMED7
	TMEM104
	TMEM106A
	TMEM107
	TMEM119
	TMEM120B
	TMEM132A
	TMEM156
	TMEM173
	TMEM185B
	TMEM221
	TMEM52
	TNF
	TNFAIP2
	TNFAIP3
	TNFAIP8L2
	TNFRSF11A
	TNFRSF13B
	TNFRSF14
	TNFRSF17
	TNFRSF1B
	TNFRSF8
	TNFSF14
	TNFSF18
	TNNI2
	TNS1
	TNS4
	TOR3A
	TOR4A
	TPBGL
	TPM1
	TPR
	TPRA1
	TRAF3IP3
	TRAF5
	TRAK1
	TRBC2
	TRBC1
	TREM2
	TREML2
	TREML4
	TRIM14
	TRIM44
	TRIM47
	TRPM2
	TRPM4
	TRPV2
	TRPV4
	TSEN54
	TSGA10IP
	TSLP
	TSPAN32
	TSPAN33
	TTC4
	TTC7A
	TUBA1C
	TUBA4A
	TUBB1
	TWF2
	TXNIP
	TYROBP
	UAP1L1
	UBA7
	UCP2
	UGT1A6
	UGT1A9
	UGT1A7
	UGT1A8
	UGT1A10
	UNC13D
	UNC93B1
	USP2
	USP21
	VAMP8
	VAV1
	VPREB3
	VPS33B
	VPS53
	VRK1
	VSIG10L
	VSNL1
	WAS
	WDFY4
	WDR81
	WDR83
	WDSUB1
	WNT11
	XCR1
	YPEL3
	ZBTB32
	ZC3H12A
	ZC4H2
	ZFHX3
	ZNF292
	ZNF330
	ZFP36
	ZNF426
	ZNF467
	ZNF629
	ZNF644
	ZNF652
	ZNF691
	ZNF703
	ZNF827
	ZFYVE26
	ZGLP1
	ZNF496
	ZMYND10
	ZMYND15
	ZYX
